# Supplementary material
Source: MDPI journal article supplement (https://www.mdpi.com/2071-1050/13/2/992)
Supplement: s1 [file s1]

|                                     |
|-------------------------------------|
| <b>Psychological distance scale</b> |
|-------------------------------------|

1. Climate change harming people right now all over the world<sup>a</sup>
2. Most scientists don't agree about climate change impacts
3. First thoughts about climate change are about how it will impact my country<sup>a</sup>
4. Future generations more likely to feel effects of climate change
5. A lot of agreement among scientists that climate change is happening<sup>a</sup>
6. Think about countries far away when thinking of climate change effects
7. The science about climate change is far from settled
8. Recent impacts of climate change mean we must tackle the issue now<sup>a</sup>
9. Climate change is likely to have a big impact on people like me<sup>a</sup>
10. Seriousness of climate change largely exaggerated
11. Worst effects will be felt by countries far from where I live
12. Uncertain what the effects of climate change will be
13. Climate change an immediate threat affecting people right now<sup>a</sup>
14. Biggest aspects will be experienced by people like me<sup>a</sup>
15. Certain that climate change is really happening<sup>a</sup>
16. Climate change more likely to impact countries far away

<sup>a</sup>items reverse-scored

|                                   |
|-----------------------------------|
| <b>Scale of coping strategies</b> |
|-----------------------------------|

1. The climate change is still increasing; this development cannot be stopped anymore
2. I think we are not spared from anything
3. I become angry, when I see what is happening there
4. I think there is nothing to blame myself for
5. Sometimes I wish everything would be all right again
6. I take the opportunity to talk to others about climate change

7. Despite the climate change, I want to have as much pleasure as possible
8. I tell myself that people coped with other things before, and therefore will be able to get these problems under control
9. I learn about global climate change
10. I think the increase of global environmental changes is not my fault
11. I wish there would be a sudden change and everything would get readjusted.
12. I make sure to obtain more precise information about climate change
13. In this context, I will not let anybody put the blame on me
14. I feel depressed, when I consider how enormous global environmental changes are in everyday life
15. The climate change does not keep me from feeling as comfortable as possible
16. I do not need to feel remorse about the climate change
17. I try to obtain a more precise view of climate change.
18. We will cope with climate change anyhow
19. The problems related to climate change cannot be solved.
20. I don't think there is a solution to climate change
21. I become angry, when I talk about climate change
22. I try to read up on how climate change can be reduced.
23. I become annoyed that nothing is done about it, even though everyone knows about these problems
24. Personally, it is important for me to be able to show my anger about these problems
25. I rarely think about climate change<sup>a</sup>
26. I think there will be a way out
27. It is important for me to talk to others about climate change and to look for solutions in everyday life
28. I do not feel responsible for this situation

29. If possible, I feel comfortable despite the environmental changes
30. I do not want these problems to keep me from enjoying recreation in nature (e.g., taking a walk)
31. I wish these global environmental changes wouldn't exist
32. It is not my fault that those environmental problems still increase
33. I feel depressed, when I talk about climate change
34. I tell myself that people have solved bigger problems, so they will be able to cope with climate change
35. I wish nature could help itself
36. I become aggressive, when I think about how many environmental problems related to climate change exist in everyday life
37. Personally, it is important for me to talk with others about climate change

*<sup>a</sup>items reverse-scored*
